# Supplementary material for: Free fatty acid receptors: structural models and elucidation of ligand binding interactions
Source: PubMed Central journal article supplement (PMC4561419; doi:10.1186/s12900-015-0044-2), 2015-09-07
Supplement: 12900_2015_44_MOESM4_ESM.pdf [file 12900_2015_44_MOESM4_ESM.pdf]

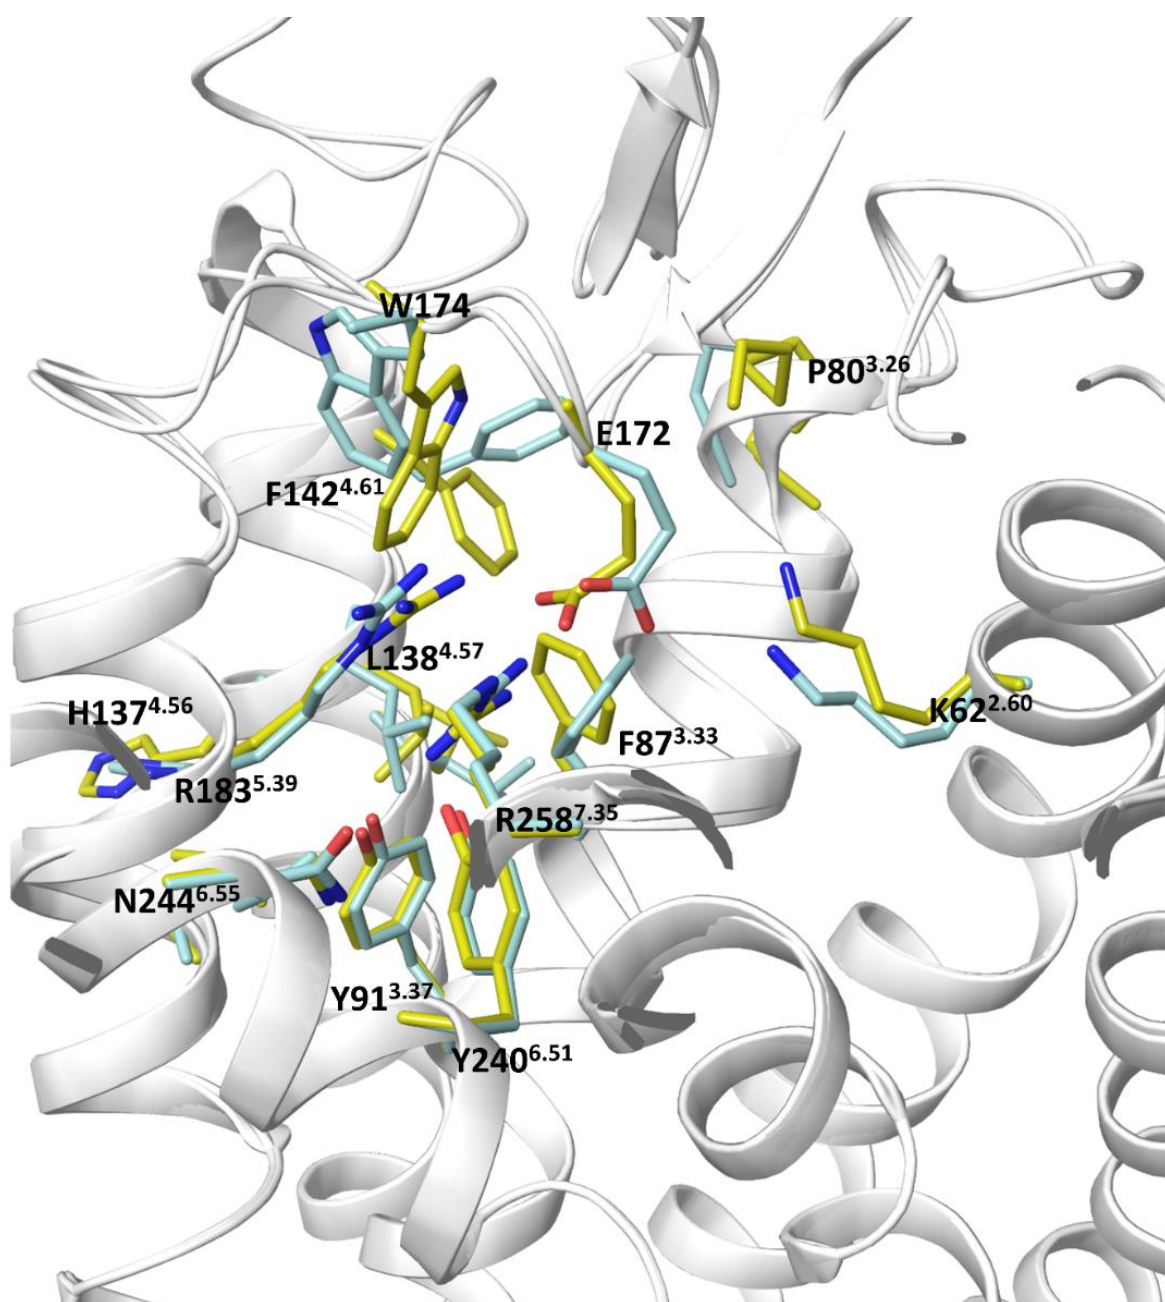

**Additional Figure 4S.** The superimposition of the FFA1 crystal structure and a characteristic conformation of FFA1 from conformational search of the FFA1 crystal structure without the ligand. The figure shows changes in the conformation of F87<sup>3.33</sup>, F142<sup>4.61</sup> and W174<sup>EL2</sup>, which close the interhelical space between helices 3 and 4.
