# Supplementary material for: Free fatty acid receptors: structural models and elucidation of ligand binding interactions
Source: PubMed Central journal article supplement (PMC4561419; doi:10.1186/s12900-015-0044-2), 2015-09-07
Supplement: 12900_2015_44_MOESM5_ESM.pdf [file 12900_2015_44_MOESM5_ESM.pdf]

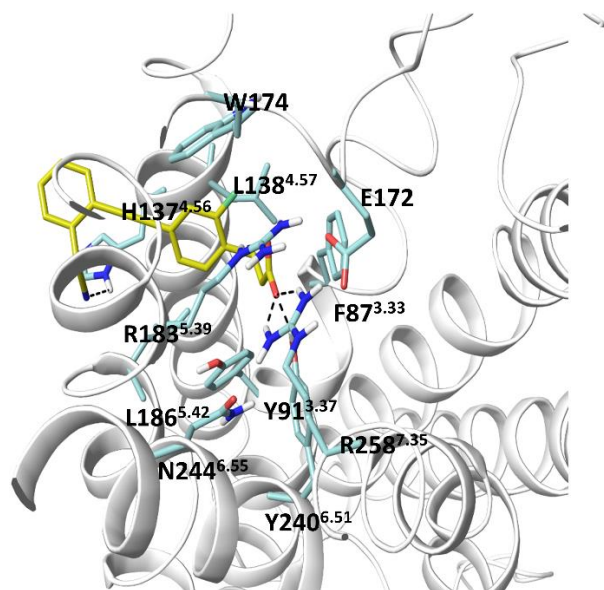

Mode 2

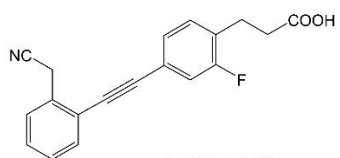

TUG-770

pEC<sub>50</sub> = 8.2

agonist

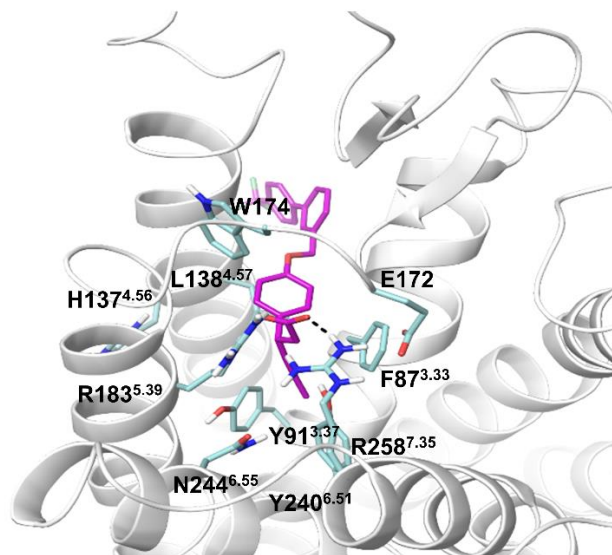

Mode 1

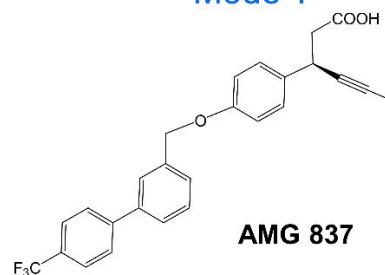

AMG 837

pEC<sub>50</sub> = 8.5

partial agonist

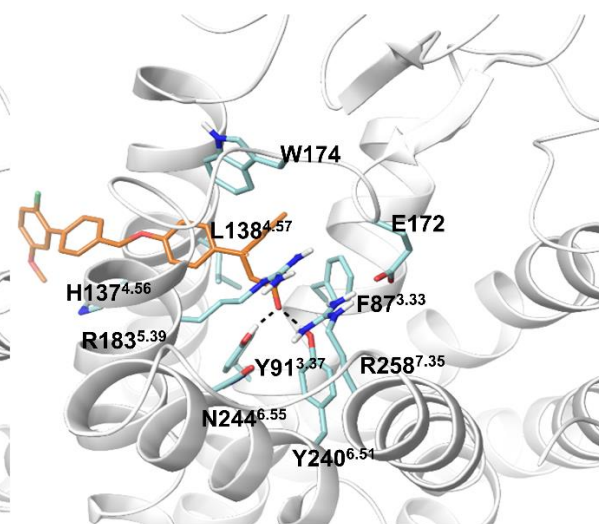

Mode 2

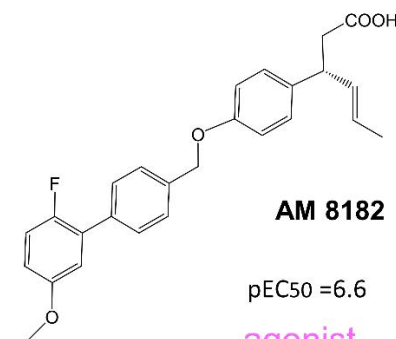

AM 8182

pEC<sub>50</sub> = 6.6

agonist

Additional Figure 5S. Agonist binding at the FFA1 crystal structure.
