# Supplementary material for: Free fatty acid receptors: structural models and elucidation of ligand binding interactions
Source: PubMed Central journal article supplement (PMC4561419; doi:10.1186/s12900-015-0044-2), 2015-09-07
Supplement: 12900_2015_44_MOESM6_ESM.pdf [file 12900_2015_44_MOESM6_ESM.pdf]

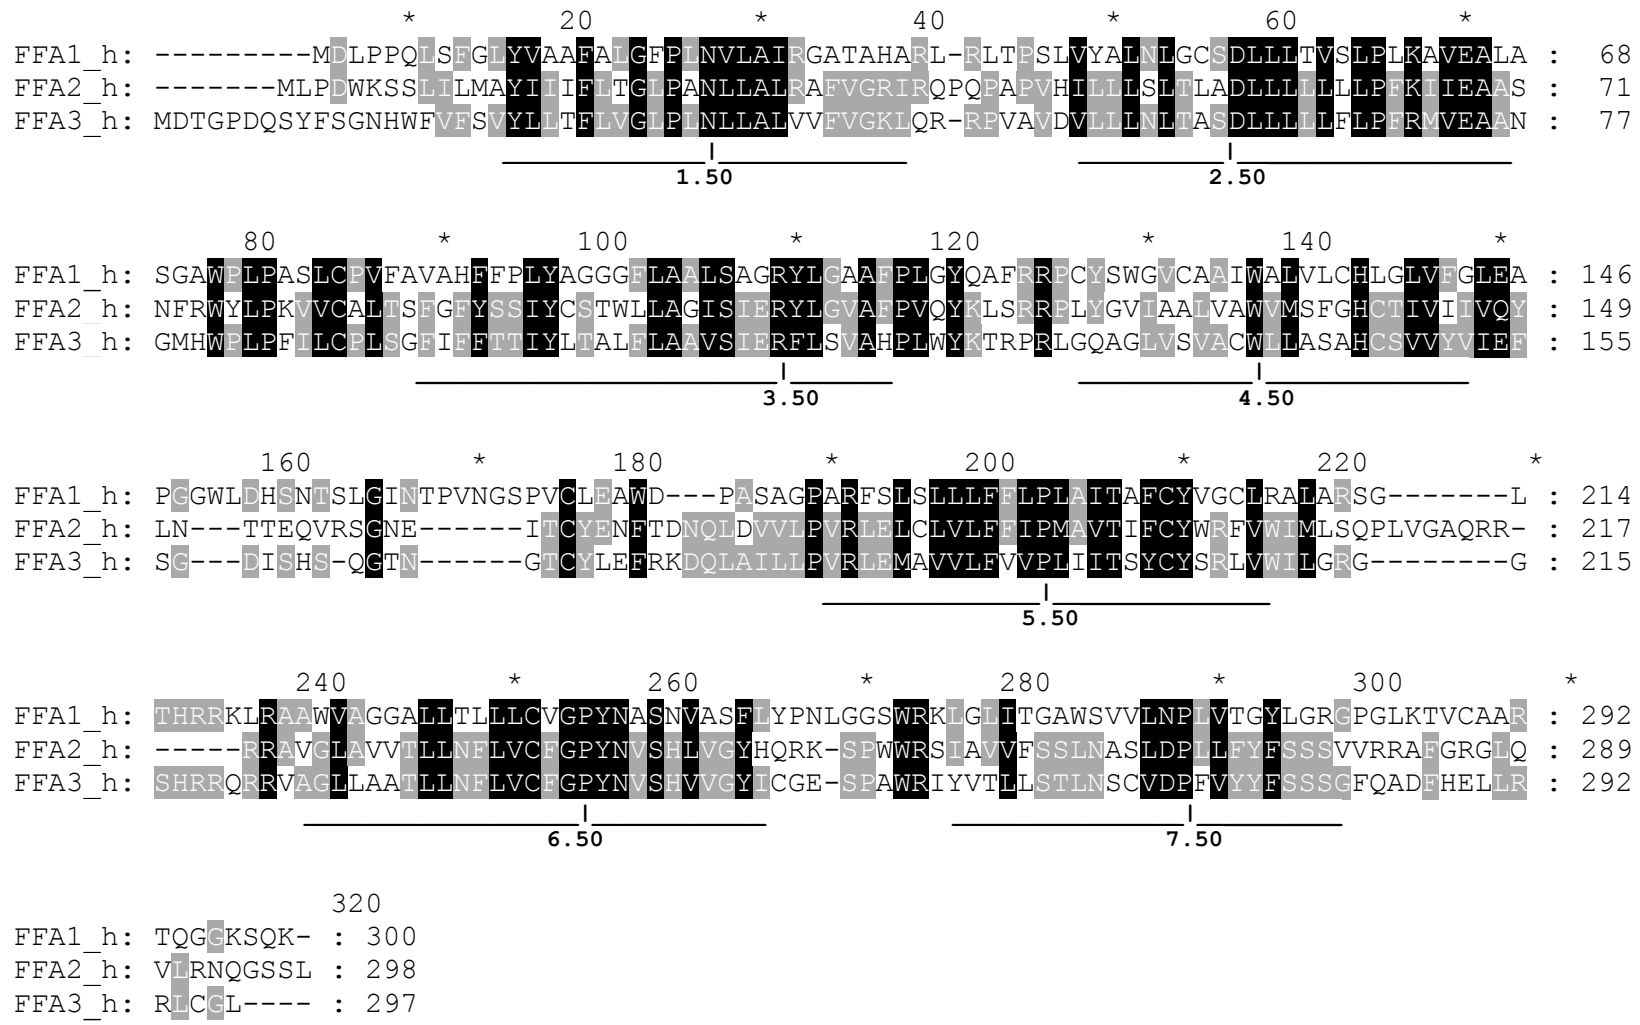

**Additional Figure 6S.** Sequence alignment of the free fatty acid receptors.
