# Supplementary material for: Free fatty acid receptors: structural models and elucidation of ligand binding interactions
Source: PubMed Central journal article supplement (PMC4561419; doi:10.1186/s12900-015-0044-2), 2015-09-07
Supplement: 12900_2015_44_MOESM7_ESM.pdf [file 12900_2015_44_MOESM7_ESM.pdf]

```

4s0v_OX2 : AKRARNISIVIIWIVSCIIMTPQAIVMECSTVNKT-----TLFTVCDERWGGEIYPK--MYHICFFLVTPMPLCLMVLAYLQFRKWCQRQIDIRARRKTARMLMVLLVFAICYLEISTLN : 232
4u15_ACM3 : TKRAGVMIGLAWVLSFVLWAPAILFVQYFVGKRT-----VPPGECFIQFLSEP-----TITFGTAIAAFYMPVTIMTILYWRKYKETEKMNDAYLIKEKAAQTLSAIILAFITITWTFYNTMV : 231
4xnv_P2Y1 : KKNACISISLVVWLVVVAISPILFYSGTGVRK-----NKTITCYDITTSDEYLRSYFIYSMCTTVAMCVPLVLIILGCYGLIVRAIYKMKKEEPLRKRKSIYLVIIIVLTVFAVSYIEFHVMMK : 235
4xt1_CX3CL : VKQACLFSIFWVIFAVIIAIPHFVVVT-----KKDNQCMTDYDYLEVSYPIILNVELMIGAVIPLSVISYCYRISRIAVS---QSRHKGRIVRVLIIVLVLEIIFWLEIYHHTL : 220
4yay_AT1R : MLVAKVTCIIIIWLAGLASLPAIHRNVFFIEN-----TNIITVCAFHYESQNSTLPIGLGLTKNIIIGLFLFIIILTSYTLWKAKKAYEINKPRNDDIFKIIMAVLFFSFWIEHQIFT : 236
4z35_LPA1 : NRRVVVIVVIVVITIAIVMGAIPSVGWNCI-----CDIENCSNMAPLYSDS-----YLVFWAIFNLVTFVVMVVLVAHIFGYADLYLRNRDTMMSLLKTVVIVLGAFTICWTEGLVLL : 225

```

|
|
|

4.50
5.50
6.60

```

60          *          280          *          300          *          320          *          340          *          360
FFAR1_HUMA : VASFLYPNLGGSRWKLGLITGAWSVVLPVLTGYLGRGPGLKTVCAARTQGGKSQK----- : 300
FFAR2_HUMA : LVGYHQKRSF-WWRSIAVVFSSLNASIDPLLFFYSSSVVRAFGRLQVLRNQGSLLGRRGKDTAEGTNEEDRQVGGEGMPSSDFTTE----- : 330
FFAR3_HUMA : VVGYICGESP-AWRIYVTLSTLNSCVDPFVYFYSSSGQADFHELLRLRCLGWQWQOQESSMELKEQKGGEEQRADRPAPERKTSSEHSQCGGTGGQVACAES : 346
2rh1_ADRB2 : IVHVIQDNRK-EVYIILLNWIGYVNSGFNPLIYC-RSPDFRFAEQELLCLRSSSLKAYGNGYSSNGTGEQSG----- : 303
2z73_rho : LLAQFGPLTP-YAAQLPVMFAKASAIHNPVIYVSVSHPKFREAISQTFPWVCCQFDDKETEDDKDAETEIPAGESSDAAPSADAAQMKE----- : 320
3odu_CXCR4 : SIDSFENTVH-KWISITETAFFHCCLNPLIYAFLGAKFKTSAQHALTSGRPL----- : 282
3pb1_D3 : VLNTHCQTSF-ELYSATTWIGYVNSALNPVIYITTFNIEFRKAFKILKILSCGRPLE----- : 277
3rze_H1 : MVIAFCCKNE-HLMFTIWIIGYINSTLNPLIYPLCNENFKKTKRILHIRSGEN----- : 284
3uon_ACM2 : IINTFCAPPN-TVWTIGYWICYINSTINPACYALCNATFKKTFKHLLMCHYKNIGA----- : 285
3v2y_S1P : LLDVGCKDIL-FRAEYFLVAVLNSGTNPLIYTLNKEMRAFIRIMGRPLEVLFQGPHHHHHHHHHHYKDDDDK----- : 300
3vw7_PAR1 : IAHYSFLSAY-FAYLLCVCVSSISCCIDPLIYYASSECCQRYVYSILCCKESSDPSCYHHHHHHHHHH----- : 303
4bvn_ADRB1 : IVNVFNRPDK-WLFVAFNWIGYANSAMNPIILC-RSPDFRKAFAKRLAFPRKADRRLHHHHHH----- : 296
4dk1_OPRM : IIKALITYPE-TTFQTVSWIGYNSCLNPLIYAFLDENFKRCFRFCPIPTSSIEQP----- : 289
4ea3_OPRX : LAQGLGVQPS-SETAVCTAIGYVNSCLNPLIYAFLDENFKACFRKFCASALGRPLEVLFQGPHHHHHHHHHH----- : 305
4eiy_A2A : CFTFFCPDPL-WLMYLAIVSHTNSVNVNPIYAYRIRERFRQTERKIIRSHVLRQOEPFKAHHHHHHHHHH----- : 305
4grv_NTSR1 : LMFYISDEQ-WFYMLTNAIAYASSAINPLIYNLVSANFRQVFLSTLACLCPGWRHRRKAHHHHHHHHHHGG----- : 304
4iar_5HT1B : IVMPICKDHL-AIFDFFTWIGYLNSLNPLIYITMSNEDFKQAFHKLIRFKCTS----- : 278
4ib4_5HT2B : IITLVLCDSLQ-MLLEIFVWIGYVSSGVNPLVYITLNFNKTFRDAFGRYITCNYRATKSVGRPLE----- : 292
4mbs_CCR5 : ILLNTFSNRDL-QAMQVTEIGMTHCCINPLIYAFVGEFFRNYLLVVFQKHIARFCKCCSIFQQEAPERASSVYTRSTGEQEI SVGLGR----- : 320
4n6h_OPRD : IVWTLVDIVV-AALHLCIAGYANSSLNPLIYAFLDENFKRCFRQLCRKPCG----- : 284
4phu_FFA1 : VASFLYPNLG-SWRKLGLITGAWSVVLPVLTGYLGRGPGLKTVCAARTQGGKSQKAENLYFQGHHHHHHHHH----- : 307
4pxz_P2Y12 : IPYTLSTQTLF-YVKESTLWITSLNACLNPLIYFFLCKSFRNSLISMLKCPNSATSLSQDNRRKQDGGDPNEETPMGRP----- : 311
4s0v_OX2 : VLKRVFGMFA-HWFTFSHWVYANSAANPLIYNFLSGKFRFEEKAAFSCCLGVHHHHHHHHHH----- : 295
4u15_ACM3 : LVNTFCDSPK-TYWNLYGWICYINSTVNPVYALCNKTFRTTEKTLLLCQCDKRRKRHHHHHHHH----- : 296
4xnv_P2Y1 : TMNLRADRVY-ATYQVTRGASLNSCVNPLIYFLAGDTFRRLSRATRKASRRSEANLQSKSEMDTLNIIPEFKQNGDTSL----- : 315
4xt1_CX3CL : FVDTLKRSLK-RALILTESAFHCCLNPLIYVFGTKFRQELHCLLAEFRQLFRSDVSWYHSMFSRRSSPSRRETSSDTLSDEVCR----- : 308
4yay_AT1R : FLDVLIQLGD-TAMPITICAYFNCLNPLIYGFGLGKKFRYFLQLLKY----- : 284
4z35_LPA1 : LLDVCCPQVL-AYEKFFLLIAEFNSAMNPLIYSYRDKEMSATFRQILGRPLEVLFQGPHHHHHHHHHHYKDDDDK----- : 300

```

|

7.50

**Additional Figure 7S.** Sequence alignment of the free fatty acid receptors and 25 GPCRs with available crystal structures. The sequence alignment was built using the HHpred server (<http://toolkit.tuebingen.mpg.de/hhpred>). The sequence name starts with the pdb-code and ends with the receptor name.

| N  | Template       | FFA1        |          |          | FFA2        |          |          | FFA3        |          |          |
|----|----------------|-------------|----------|----------|-------------|----------|----------|-------------|----------|----------|
|    | PDB_name       | probability | E-value  | P-value  | probability | E-value  | P-value  | probability | E-value  | P-value  |
| 1  | 2rh1_ADRB2     | 100         | 4.90E-43 | 1.40E-47 | 100         | 5.00E-44 | 1.40E-48 | 100         | 7.10E-44 | 2.00E-48 |
| 2  | 2z73_RHODOPSIN | 100         | 9.70E-41 | 2.70E-45 | 100         | 5.20E-42 | 1.50E-46 | 100         | 8.10E-43 | 2.30E-47 |
| 3  | 3odu_CXCR4     | 100         | 5.00E-43 | 1.40E-47 | 100         | 7.00E-43 | 2.00E-47 | 100         | 4.00E-43 | 1.10E-47 |
| 4  | 3pbl_D3        | 100         | 6.80E-42 | 1.90E-46 | 100         | 3.80E-42 | 1.10E-46 | 100         | 1.60E-42 | 4.60E-47 |
| 5  | 3rze_H1        | 100         | 9.70E-43 | 2.80E-47 | 100         | 1.60E-42 | 4.40E-47 | 100         | 2.10E-42 | 5.90E-47 |
| 6  | 3uon_ACM2      | 100         | 4.10E-43 | 1.10E-47 | 100         | 7.40E-43 | 2.10E-47 | 100         | 2.20E-43 | 6.20E-48 |
| 7  | 3v2y_S1P       | 100         | 4.50E-39 | 1.30E-43 | 100         | 1.80E-40 | 5.10E-45 | 100         | 2.90E-40 | 8.10E-45 |
| 8  | 3vw7_PAR1      | 100         | 2.20E-43 | 6.30E-48 | 100         | 3.00E-44 | 8.50E-49 | 100         | 1.60E-44 | 4.50E-49 |
| 9  | 4bvn_ADRB1     | 100         | 3.30E-44 | 9.40E-49 | 100         | 1.00E-44 | 2.90E-49 | 100         | 1.80E-44 | 5.10E-49 |
| 10 | 4dkl_OPRM      | 100         | 2.70E-43 | 7.70E-48 | 100         | 2.80E-43 | 8.00E-48 | 100         | 1.10E-43 | 3.20E-48 |
| 11 | 4ea3_OPRX      | 100         | 4.10E-40 | 1.20E-44 | 100         | 7.60E-41 | 2.10E-45 | 100         | 3.30E-41 | 9.40E-46 |
| 12 | 4eiy_A2A       | 100         | 9.20E-41 | 2.60E-45 | 100         | 6.60E-42 | 1.90E-46 | 100         | 1.30E-41 | 3.60E-46 |
| 13 | 4grv_NTSR1     | 100         | 2.70E-41 | 7.60E-46 | 100         | 4.20E-42 | 1.20E-46 | 100         | 1.10E-42 | 3.20E-47 |
| 14 | 4iar_5HT1B     | 100         | 2.80E-44 | 7.90E-49 | 100         | 4.40E-44 | 1.20E-48 | 100         | 2.20E-44 | 6.30E-49 |
| 15 | 4ib4_5HT2B     | 100         | 1.60E-41 | 4.60E-46 | 100         | 2.00E-41 | 5.60E-46 | 100         | 9.40E-42 | 2.70E-46 |
| 16 | 4mbs_CCR5      | 100         | 2.60E-42 | 7.50E-47 | 100         | 2.10E-43 | 6.10E-48 | 100         | 1.10E-43 | 3.10E-48 |
| 17 | 4n6h_OPRD      | 100         | 4.50E-40 | 1.30E-44 | 100         | 4.10E-40 | 1.20E-44 | 100         | 2.10E-40 | 6.10E-45 |
| 18 | 4phu_FFA1      | 100         | 5.10E-42 | 1.40E-46 | 100         | 7.90E-42 | 2.20E-46 | 100         | 3.30E-42 | 9.30E-47 |
| 19 | 4pxz_P2Y12     | 100         | 5.80E-44 | 1.60E-48 | 100         | 1.40E-44 | 3.90E-49 | 100         | 1.20E-45 | 3.30E-50 |
| 20 | 4s0v_OX2       | 100         | 1.20E-39 | 3.40E-44 | 100         | 2.80E-39 | 7.80E-44 | 100         | 1.40E-39 | 3.80E-44 |
| 21 | 4u15_ACM3      | 100         | 3.40E-42 | 9.70E-47 | 100         | 1.00E-42 | 2.90E-47 | 100         | 7.70E-43 | 2.20E-47 |
| 22 | 4xnv_P2Y1      | 100         | 1.40E-42 | 3.90E-47 | 100         | 3.60E-44 | 1.00E-48 | 100         | 3.00E-44 | 8.60E-49 |
| 23 | 4xt1_CX3CL     | 100         | 2.50E-39 | 7.10E-44 | 100         | 2.70E-41 | 7.50E-46 | 100         | 2.60E-42 | 7.30E-47 |
| 24 | 4yay_AT1R      | 100         | 6.20E-40 | 1.70E-44 | 100         | 1.30E-40 | 3.60E-45 | 100         | 5.00E-41 | 1.40E-45 |
| 25 | 4z35_LPA1      | 100         | 1.20E-38 | 3.30E-43 | 100         | 2.1E-40  | 5.9E-45  | 100         | 1.20E-40 | 3.40E-45 |

**Additional Table 2S.** HHpred server (<http://toolkit.tuebingen.mpg.de/hhpred>) predictions of a homologous relationship. Probability represents a homologous relationship; E-value is the average expected number of non-homologous proteins with a score higher than the one obtained for the database match. An E-value <<< 1 indicates statistical significance; and P-values is the area under the extreme value distribution. Receptor templates are shown with a pdb code and receptor name. The calculated values indicate a strong homologous relationship.
