# Supplementary material for: Free fatty acid receptors: structural models and elucidation of ligand binding interactions
Source: PubMed Central journal article supplement (PMC4561419; doi:10.1186/s12900-015-0044-2), 2015-09-07
Supplement: 12900_2015_44_MOESM9_ESM.pdf [file 12900_2015_44_MOESM9_ESM.pdf]

| Available receptor templates         | FFA1<br>GPR40 | FFA2<br>GPR43 | FFA3<br>GPR41 |
|--------------------------------------|---------------|---------------|---------------|
| <b>Amine Family</b>                  |               |               |               |
| $\beta$ adrenergic 1 ( $\beta_1$ )   | 18            | 18            | 15            |
| $\beta$ adrenergic 2 ( $\beta_2$ )   | 16            | 17            | 17            |
| dopamine ( $D_3$ )                   | 18            | 22            | 23            |
| histamine1 ( $H_1$ )                 | 16            | 19            | 18            |
| muscarinic acetylcholine 2 ( $M_2$ ) | 16            | 22            | 21            |
| muscarinic acetylcholine 3 ( $M_3$ ) | 15            | 21            | 21            |
| serotonin ( $5HT_{1B}$ )             | 14            | 21            | 18            |
| serotonin ( $5HT_{2B}$ )             | 22            | 22            | 19            |
| <b>Peptide Family</b>                |               |               |               |
| angiotensin ( $AT_1$ )               | <b>26</b>     | 22            | 25            |
| chemokine ( $CXCR_4$ )               | 23            | 25            | 25            |
| chemokine ( $CCR5$ )                 | 24            | 23            | 27            |
| chemokine ( $CX3CR1$ )               | 24            | 24            | 27            |
| neurotensin ( $NTS_1$ )              | 16            | 21            | 22            |
| nociceptin (NOP)                     | 21            | 22            | 28            |
| $\delta$ opioid ( $\delta$ -OP)      | 21            | 22            | 24            |
| $\kappa$ opioid ( $\kappa$ -OP)      | 18            | 26            | 24            |
| $\mu$ opioid ( $\mu$ -OP)            | 19            | 22            | 25            |
| orexin ( $OX_2$ )                    | 19            | 20            | 23            |
| protease-activated ( $PAR_1$ )       | <b>26</b>     | 28            | <b>33</b>     |
| <b>Nucleotide Family</b>             |               |               |               |
| adenosine ( $A_{2A}$ )               | 17            | 17            | 18            |
| purine ( $P2Y_{12}$ )                | 20            | <b>30</b>     | 26            |
| purine ( $P2Y_1$ )                   | 19            | 23            | 28            |
| <b>Lysosphingolipid Family</b>       |               |               |               |
| lysophosphatidic acid ( $LPA_1$ )    | 13            | 19            | 19            |
| sphingosine 1-phosphate ( $S1P_1$ )  | 16            | 17            | 17            |
| <b>Free Fatty Acid Family</b>        |               |               |               |
| free fatty acid (FFA1)               |               | <b>32</b>     | <b>33</b>     |
| <b>Rhodopsin</b> (rho, opsin)        | 16            | 22            | 22            |

**Additional Table 1S.** Sequence identity (%) in the transmembrane helices of the FFA receptors and 26 GPCRs with available crystal structures. High identity is highlighted in bold.
